# Supplementary material
Source: PubMed Central journal article supplement (PMC3424729)

Online Supplemental Material Figure 1.

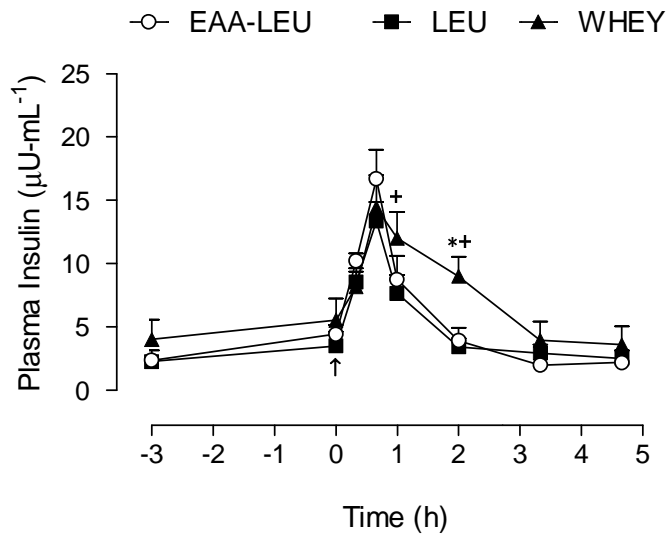

**Supplemental Figure 1. Mean ( $\pm$ SEM) plasma insulin concentration ( $\mu\text{U}\cdot\text{mL}^{-1}$ ) following EAA-LEU, LEU, and WHEY treatments.** Upward arrow indicates time of treatment administration. \*Significantly greater than EAA-LEU ( $P < 0.05$ ); +Significantly greater than LEU ( $P < 0.05$ ).

Online Supplemental Material Figure 2.

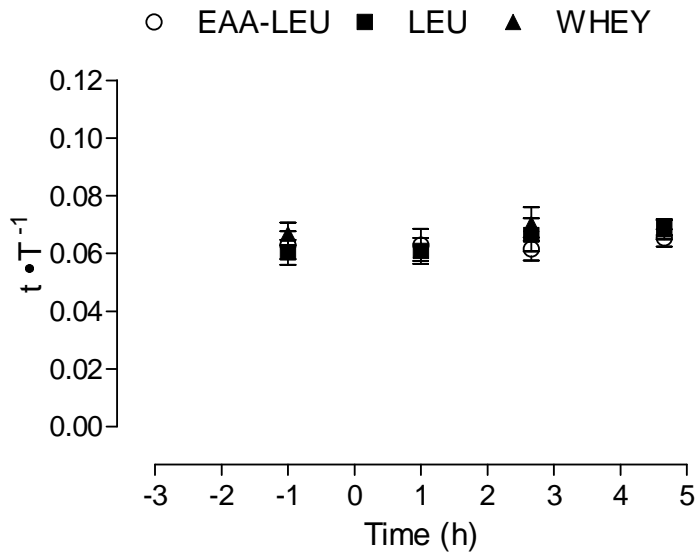

**Supplemental Figure 2. Mean ( $\pm$  SEM) plasma free phenylalanine enrichments (tracer-to-tracee ratio  $t \cdot T^{-1}$ ) over time.** Data were analyzed using a 2-factor (treatment  $\times$  time) repeated measures ANOVA and linear regression. There were no differences between treatments ( $P = 0.66$ ) or across time ( $P = 0.34$ ). The slope of plasma free phenylalanine enrichment by time was not different from zero for any treatment group (EAA-LEU  $P = 0.95$ ; LEU  $P = 0.11$ ; WHEY  $P = 0.40$ ).

Online Supplemental Material Figure 3.

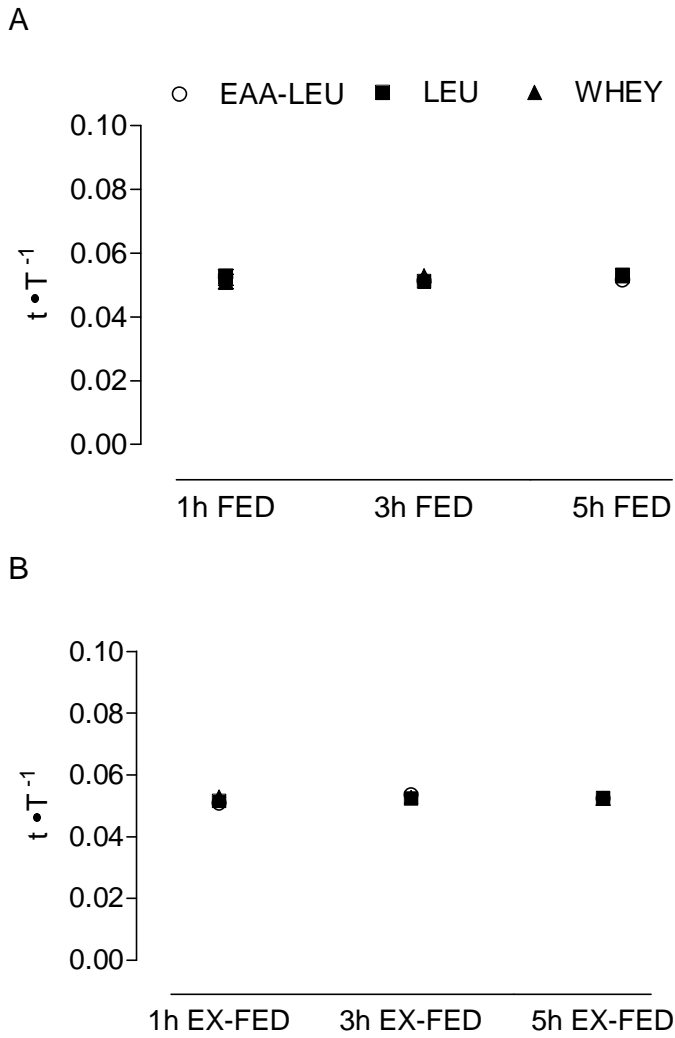

**Supplemental Figure 3. Mean ( $\pm$  SEM) intracellular free phenylalanine enrichments (tracer-to-tracee ratio –  $t \cdot T^{-1}$ ) in both FED (A) and EX-FED (B) conditions.** Conditions (i.e. FED and EX-FED) were analyzed separately using a 2-factor (treatment  $\times$  time) repeated measures ANOVA (FED: time  $P = 0.92$ ; treatment,  $P = 0.90$ . EX-FED: time  $P = 0.30$ ; treatment  $P = 0.88$ ). Condition effects were analyzed separately at 1 ( $P = 0.90$ ), 3 ( $P = 0.42$ ), and 5h ( $P = 0.98$ ) post-exercise recovery using a 2-factor (treatment  $\times$  condition) ANOVA. Data were also analyzed using linear regression for the difference of the linear regression slope from zero (EAA-LEU FED  $P = 0.77$ , EX-FED  $P = 0.41$ ; LEU FED  $P = 0.84$ , EX-FED  $P = 0.68$ ; WHEY FED  $P = 0.56$ , EX-FED  $P = 0.84$ ).

Online Supplemental Material Figure 4.

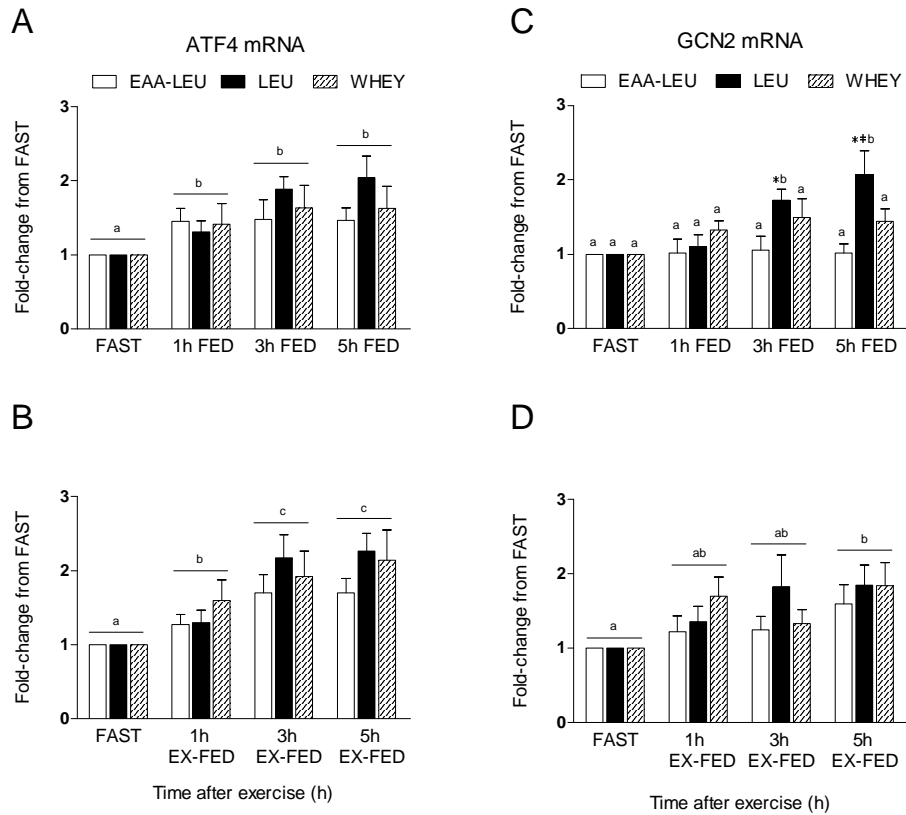

**Supplemental Figure 4. Mean ( $\pm$  SEM) mRNA expression of ATF4 (A and B) and GCN2 (C and D) (expressed as fold-difference from FAST) at 1, 3, and 5 post-exercise recovery in both FED and EX-FED conditions following EAA-LEU, LEU, and WHEY treatments. Times with different letters are significantly different from each other within that treatment and condition. \*Significantly greater than EAA-LEU within that time and condition ( $P < 0.05$ ); ‡Significantly greater than WHEY within that time and condition ( $P < 0.05$ ).**

Online Supplemental Material Figure 5

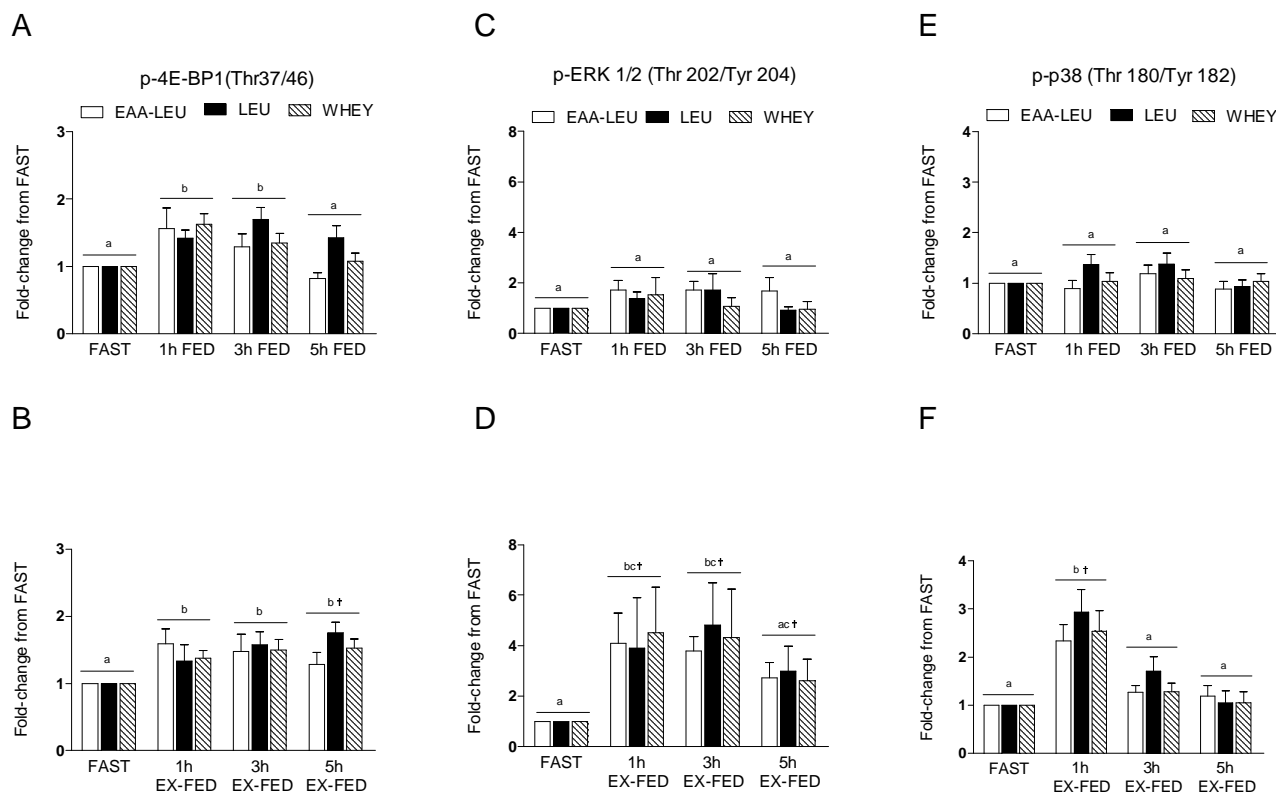

**Supplemental Figure 5. Mean ( $\pm$  SEM) phosphorylation status of 4E-BP1<sup>Thr 37/46</sup> (A and B), ERK 1/2<sup>Thr202/Tyr204</sup> (C and D) and p38<sup>Thr180/Tyr182</sup> (E and F) (expressed as fold-difference from FAST) at 1, 3, and 5 post-exercise recovery in both FED and EX-FED conditions following EAA-LEU, LEU, and WHEY treatments. Times with different letters are significantly different from each other within that treatment and condition. †Significantly greater than EX-FED condition at that time-point; all  $P < 0.05$ .**

Online Supplemental Material Figure 6

**Supplemental Figure 6. Representative blot images for p-Akt<sup>Ser473</sup>, p-mTOR<sup>Ser2448</sup>, p-p70S6k<sup>Thr389</sup>, p-4E-BP1<sup>Thr 37/46</sup>, p-ERK 1/2<sup>Thr202/Tyr204</sup>, p-p38<sup>Thr180/Tyr182</sup>, and  $\alpha$ -tubulin at FAST, 1h EX-FED, 1h FED, 3h EX-FED; 3h FED, 5h EX-FED, and 5h FED following EAA-LEU, LEU, and WHEY treatments. Image contrast adjusted to improve clarity.**

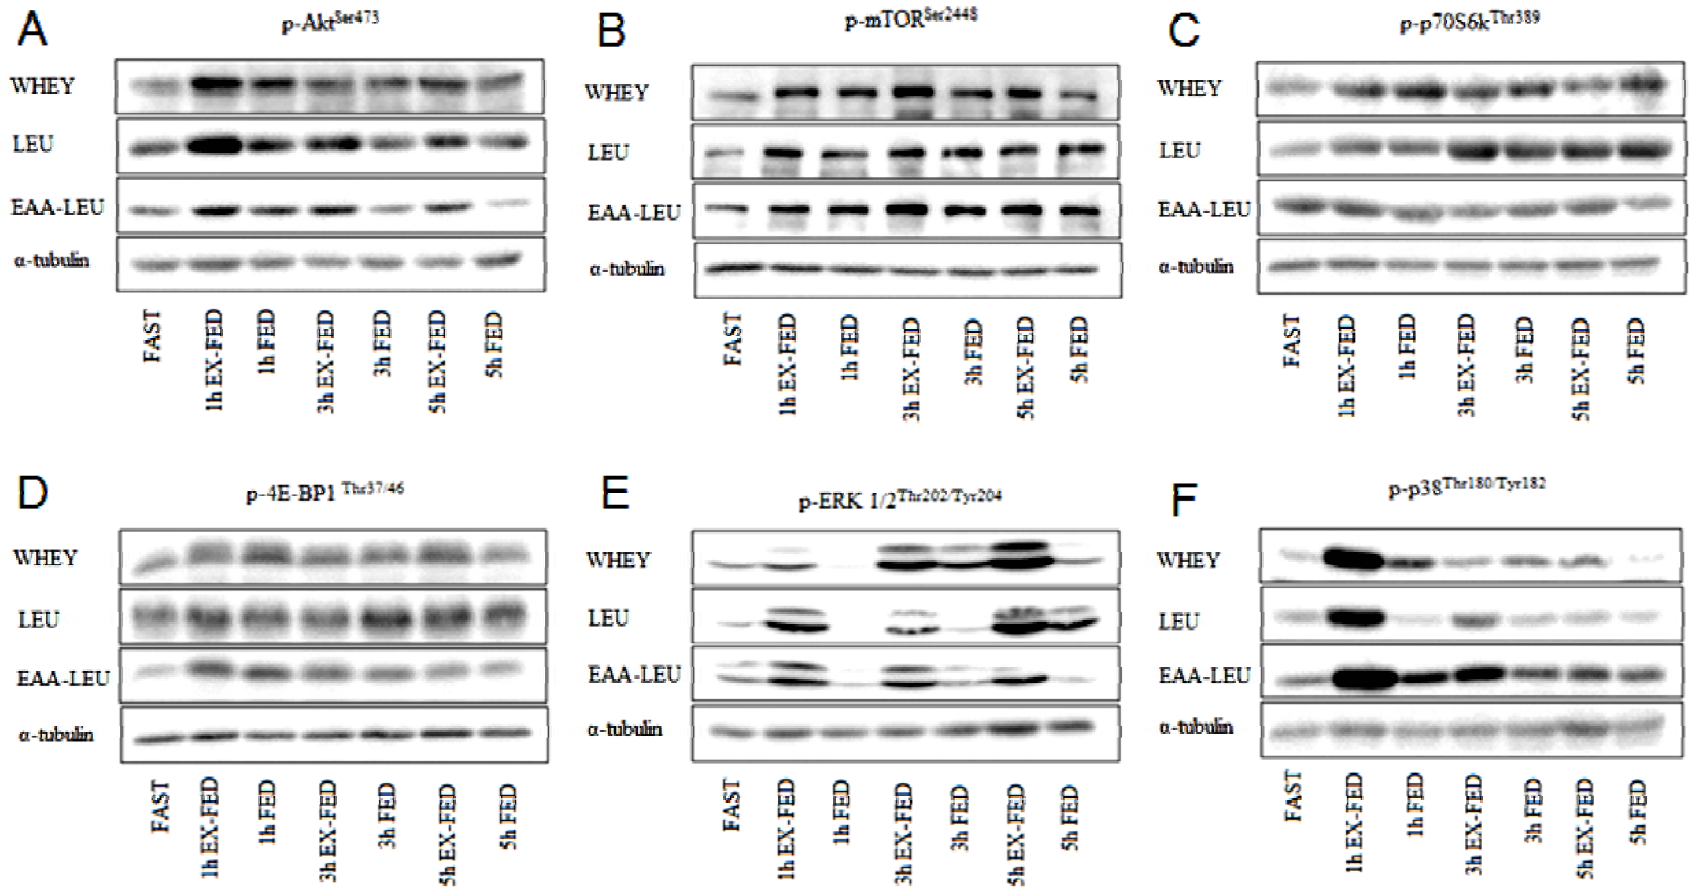

Supplement: tjp0590-2751-SD1.pdf [file tjp0590-2751-SD1.pdf]
